# Supplementary material for: An Arginine Deprivation Response Pathway Is Induced in Leishmania during Macrophage Invasion
Source: PubMed Central journal article supplement (PMC4846328; doi:10.1371/journal.ppat.1005494), 2016-04-04
Supplement: ppat.1005494.s001.pdf [file ppat.1005494.s001.pdf]

## Supplements

**Table S1:** Phosphorylation changes following 5 minute of arginine deprivation in *L. donovani* promastigotes

| Accession number | Description                            | Phosphorylated tryptic peptide        | Repeat 1                               | Repeat 2 |
|------------------|----------------------------------------|---------------------------------------|----------------------------------------|----------|
|                  |                                        |                                       | Log <sub>2</sub> fold from non-starved |          |
| LinJ.27.1120     | histone H1, putative                   | SSDSAVAALSAAMT <b>p</b> SPQK          | 2.537                                  | 2.51     |
| LinJ.33.1330     | hypothetical protein, conserved        | E <b>p</b> SAVAPPPLLHHFTTQQEPK        | 1.809                                  | 1.09     |
| LinJ.26.2010     | hypothetical protein, conserved        | KVHAGDNEG DAG <b>p</b> SAPR           | 1.47                                   | 1.13     |
| LinJ.19.0580     | hypothetical protein, conserved        | IQLAAGL <b>p</b> SR                   | 7.59                                   | 1.1      |
| LinJ.22.0040     | hypothetical protein, conserved        | G <b>p</b> SF SHNPYAEAS <b>p</b> SFQN | 6.55                                   | 2.85     |
| LinJ.27.1080     | hypothetical protein, conserved        | RK <b>p</b> SDNAVTLSSSSSVR            | 4.28                                   | 1.09     |
| LinJ.34.4190     | RNA-binding protein-like protein       | HWL <b>p</b> SPQYR                    | 4.23                                   | 3.09     |
| LinJ.20.0650     | hypothetical protein                   | R <b>p</b> SAPSLAPPR                  | 2.93                                   | 1.75     |
| LinJ.34.2150     | hypothetical protein, unknown function | LAN <b>p</b> SFSNASCHLER              | 2.43                                   | 3.03     |
| LinJ.32.1190     | hypothetical protein, conserved        | SGPS <b>p</b> SPTAK                   | 2.29                                   | 1.12     |
| LinJ.06.1010     | hypothetical protein, conserved        | SL <b>p</b> STLQK                     | 2.14                                   | 1.75     |
| LinJ.11.0400     | tubulin-tyrsoine ligase-like protein   | H <b>p</b> SVVGAE AASAASK             | 2.02                                   | 1.91     |

|              |                                                                 |                                                 |      |      |
|--------------|-----------------------------------------------------------------|-------------------------------------------------|------|------|
| LinJ.25.2450 | serine/threonine-protein kinase, putative                       | LFGGF <b>p</b> SCTADSHLNNS                      | 2    | 2.99 |
| LinJ.13.1350 | MCAK-like kinesin, putative                                     | DPNTDDGENAVRPAAAPAKPV <b>p</b> SRPV <b>p</b> SR | 1.96 | 1.38 |
| LinJ.22.0040 | hypothetical protein, conserved                                 | ASR <b>p</b> SPLICSQR                           | 1.96 | 2.04 |
| LinJ.33.2270 | hypothetical protein, conserved                                 | ESVSAAP <b>p</b> SPNATVAASR                     | 1.96 | 1.22 |
| LinJ.35.0320 | serine palmitoyltransferase, putative                           | EIALQEASDAVDNKSQVL <b>p</b> SK                  | 1.96 | 1.97 |
| LinJ.36.2040 | inosine-guanosine transporter                                   | AVP <b>p</b> SDAFVAK                            | 1.89 | 1.32 |
| LinJ.36.1720 | universal minicircle sequence binding protein (UMSBP), putative | GR <b>p</b> SGAQGGYGGDR                         | 1.79 | 1.45 |
| LinJ.13.1350 | MCAK-like kinesin, putative                                     | SYHRPT <b>p</b> TH <b>p</b> SR                  | 1.69 | 0.92 |
| LinJ.31.2130 | hypothetical protein, conserved                                 | NN <b>p</b> SFFSK                               | 1.58 | 2.07 |
| LinJ.11.0400 | tubulin-tyrosine ligase-like protein                            | APATAESASNQPHQRH <b>p</b> SVVGAEAAASAASK        | 1.53 | 1.47 |
| LinJ.09.0520 | serine/threonine protein phosphatase, putative                  | DAD <b>p</b> TPVVSSK                            | 1.44 | 0.99 |
| LinJ.06.1020 | hypothetical protein, conserved                                 | SSVSV <b>p</b> TPSR                             | 1.4  | 2.18 |
| LinJ.33.1090 | hypothetical protein, conserved                                 | SGKPGASAATAS <b>p</b> SPIGASANGAR               | 1.38 | 1    |
| LinJ.34.2390 | hypothetical protein, conserved                                 | VREP <b>p</b> SAANTR                            | 1.35 | 0.94 |
| LinJ.10.0320 | hypothetical protein, conserved                                 | RG <b>p</b> SAGDNVAQDVIVITSGDILLR               | 1.34 | 0.99 |
| LinJ.16.1550 | kinesin, putative                                               | GHPVGV <b>p</b> TPK                             | 1.34 | 0.81 |

|              |                                                   |                          |      |       |
|--------------|---------------------------------------------------|--------------------------|------|-------|
| LinJ.24.1000 | hypothetical protein, conserved                   | RGpSLGGANAQQR            | 1.33 | 1.49* |
| LinJ.30.1280 | hypothetical protein, unknown function            | KQHNVDpTPSSFpSLAGEEGGTAK | 1.31 | 1.15  |
| LinJ.11.0520 | nucleobase transporter                            | KAELLETEHGDVpTAR         | 1.3  | 1.55  |
| LinJ.19.0690 | kinesin, putative                                 | SDpSISApTPTR             | 1.3  | 1.03  |
| LinJ.21.1850 | hypothetical protein, conserved                   | VEQVLAHQMSpSASGR         | 1.3  | 1.74  |
| LinJ.01.0790 | eukaryotic initiation factor 4a, putative         | FCETFVGGpTR              | 1.29 | 2.12  |
| LinJ.34.0640 | hypothetical protein, conserved                   | RLpSLHLEpSPLK            | 1.25 | 1.02  |
| LinJ.07.0780 | topoisomerase-related function protein            | ALDADALQATVHLQpSPSHGEK   | 1.19 | 1.36  |
| LinJ.34.2680 | PKA regulatory subunit of protein kinase a-R'     | TIQMQRpSR                | 1.19 | 1.06  |
| LinJ.12.0610 | serine/threonine protein phosphatase-like protein | RTYpSNGpSTEVK            | 1.18 | 1.05  |
| LinJ.19.0290 | RNA binding protein, putative                     | AGNVpSINQHEGQR           | 1.18 | 1.03  |
| LinJ.28.1130 | hypothetical protein, unknown function            | VApSAPPALAVTGK           | 1.17 | 1.25  |
| LinJ.35.2610 | hypothetical protein, conserved                   | RPSPpSLNDPPAFVR          | 1.16 | 0.95  |
| LinJ.05.0850 | hypothetical protein, conserved                   | pSRHVpTPGHGSADSGSSPGK    | 1.13 | 1.5   |

|              |                                                   |                                                 |      |      |
|--------------|---------------------------------------------------|-------------------------------------------------|------|------|
| LinJ.12.0610 | serine/threonine protein phosphatase-like protein | NT <b>p</b> SFSGSGTGR                           | 1.13 | 1.14 |
| LinJ.13.1350 | MCAK-like kinesin, putative                       | MVN <b>p</b> SFHR                               | 1.12 | 1.11 |
| LinJ.15.1170 | hypothetical protein, conserved                   | RS <b>p</b> SEGSPiR                             | 1.11 | 0.94 |
| LinJ.36.0780 | MPK2 mitogen-activated protein kinase             | KT <b>p</b> SV <b>p</b> SASAGGSR                | 1.1  | 0.99 |
| LinJ.32.0320 | hypothetical protein, conserved                   | RS <b>p</b> SVIDEVDR                            | 1.07 | 1.2  |
| LinJ.10.0110 | hypothetical protein, conserved                   | NAVDDL <b>Fp</b> SDDDKPK                        | 1.06 | 0.89 |
| LinJ.35.3250 | hypothetical protein, conserved                   | EFVPHFQLIAN <b>p</b> SPEYRPTPPPK                | 1.06 | 1.45 |
| LinJ.20.1130 | hypothetical protein, conserved                   | GTA <b>A</b> <b>p</b> SFTDHSR                   | 0.94 | 0.79 |
| LinJ.32.1190 | hypothetical protein, conserved                   | FT <b>Pi</b> <b>p</b> SPSVASPATKR               | 0.91 | 0.95 |
| LinJ.11.0140 | hypothetical protein, conserved                   | GQLNYDHLLDEVV <b>p</b> SK                       | 0.9  | 2.87 |
| LinJ.28.2120 | hypothetical protein, conserved                   | AVSPAEEQALR <b>p</b> SQC <b>p</b> SpTPR         | 0.9  | 1.03 |
| LinJ.19.1080 | hypothetical protein, conserved                   | AEHR <b>A</b> <b>p</b> SLPALTAVLD <b>p</b> SPVK | 0.88 | 0.77 |
| LinJ.24.2010 | hypothetical protein, conserved                   | AT <b>p</b> SEVLAHPAR                           | 0.88 | 0.86 |
| LinJ.24.1000 | hypothetical protein, conserved                   | RA <b>p</b> SQHLAAPSPR                          | 0.85 | 1.28 |
| LinJ.30.3130 | hypothetical protein, conserved                   | KV <b>p</b> SEAVGDR                             | 0.82 | 0.89 |
| LinJ.32.0270 | serine/threonine-protein kinase Nek1, putative    | RGAPPGE <b>P</b> <b>p</b> SR <b>Pp</b> TTPQQQR  | 0.8  | 0.75 |

|              |                                           |                                                   |       |       |
|--------------|-------------------------------------------|---------------------------------------------------|-------|-------|
| LinJ.34.0640 | hypothetical protein, conserved           | RH <b>p</b> SNFDLSVGTPLPLGGSGK                    | 0.8   | 1.18  |
| LinJ.11.0400 | tubulin-tyrsoine ligase-like protein      | VRPPLLGPLLTT <b>p</b> SR                          | 0.79  | 0.59  |
| LinJ.13.1350 | MCAK-like kinesin, putative               | VGAS <b>p</b> SP <b>p</b> SPFGR                   | 0.79  | 0.44  |
| LinJ.04.0060 | hypothetical protein, conserved           | AGHFYGA <b>p</b> SVR                              | 0.78  | 0.71  |
| LinJ.09.0840 | hypothetical protein, conserved           | APP <b>p</b> TPSQQK                               | 0.75  | 1.09  |
| LinJ.08.0130 | hypothetical protein, conserved           | AAQASPFAGQN <b>p</b> SR                           | 0.74  | 0.93  |
| LinJ.08.0130 | hypothetical protein, conserved           | VVVVESEAP <b>p</b> SPHAR <b>p</b> SGHAAFQR        | 0.74  | 0.81  |
| LinJ.13.0700 | hypothetical protein, conserved           | GDNLLHDSQTPCDAAAAGSSIVANN <b>p</b> TPR            | 0.72  | 0.83  |
| LinJ.16.0390 | tubulin tyrosine ligase, putative         | VDEAPL <b>p</b> TSR                               | 0.7   | 0.92  |
| LinJ.36.7250 | hypothetical protein, conserved           | VGLPIFGHAFQFKPVTESAE <b>p</b> SPR                 | 0.7   | 1.02  |
| LinJ.35.4190 | hypothetical protein, conserved           | SR <b>p</b> SVNTTQGSVPGAKPVPSR                    | 0.69  | 0.83  |
| LinJ.36.0780 | Mitogen-activated protein kinase 2 (MPK2) | SILSLEGEQASRPVL <b>p</b> TD <b>p</b> YIATR        | 0.69  | 0.78  |
| LinJ.27.0630 | hypothetical protein, conserved           | LRPV <b>p</b> SQHGAK                              | 0.51  | 0.94  |
| LinJ.28.2120 | hypothetical protein, conserved           | AV <b>p</b> SPAEQEALR <b>p</b> SQC <b>p</b> SpTPR | 0.41  | 1.03  |
| LinJ.20.1130 | hypothetical protein, conserved           | AAFRPLG <b>p</b> SSDTEVDVDDFTAPSR                 | -0.48 | -2.19 |
| LinJ.34.3220 | DNA topoisomerase IB, large subunit       | ANKVV <b>p</b> SDDDDVPLAALRV                      | -0.62 | -0.67 |
| LinJ.05.0870 | hypothetical protein, conserved           | GASAPTLPS <b>p</b> SPR                            | -0.67 | -3.62 |

|              |                                                               |                                                 |       |       |
|--------------|---------------------------------------------------------------|-------------------------------------------------|-------|-------|
| LinJ.36.4540 | hypothetical protein, conserved                               | YLGGANNIHSYV <b>Gp</b> SPGQSFR                  | -0.68 | -0.76 |
| LinJ.27.0550 | hypothetical protein, conserved                               | DSMVVEELKADAIN <b>p</b> SGGR                    | -0.72 | -0.66 |
| LinJ.22.0060 | hypothetical protein, conserved                               | ASVENARH <b>p</b> SAQNAVDNAK                    | -0.74 | -1.11 |
| LinJ.36.6110 | hypothetical protein, conserved                               | KRGG <b>p</b> SINGATALLR                        | -0.75 | -0.69 |
| LinJ.31.2870 | hypothetical, protein kinase                                  | SHTHTQLEESEMPNA <b>p</b> TPK                    | -0.76 | -1.07 |
| LinJ.20.1130 | hypothetical protein, conserved                               | AAFRPLG <b>pSpSDp</b> TEDVDDFTAPSR              | -0.77 | -2.19 |
| LinJ.28.2710 | hypothetical protein, conserved                               | HPQPTVQPT <b>p</b> SPALDVAEGLHFQK               | -0.77 | -0.9  |
| LinJ.10.0200 | MPK10 mitogen-activated protein kinase                        | TH <b>p</b> SLMELAGNAPAPS                       | -0.83 | -0.65 |
| LinJ.11.0880 | hypothetical protein, conserved                               | TVAAPHKAD <b>p</b> STASPTAPEIVK                 | -0.84 | -0.81 |
| LinJ.21.0700 | phosphoglucomutase, putative                                  | KATGAFILTA <b>p</b> SHNPGGPDADFGIK              | -0.85 | -0.51 |
| LinJ.28.2710 | hypothetical protein, conserved                               | HPQPTVQPT <b>p</b> SSPALDVAEGLHFQK              | -0.86 | -0.9  |
| LinJ.17.0310 | hypothetical protein, conserved                               | QSRPSSVSL LADDRAPP <b>p</b> SPVHEPLLGVAAEEEEANR | -0.87 | -1.1  |
| LinJ.17.0490 | hypothetical protein, conserved                               | AAGGQQTTPH <b>p</b> SPV <b>p</b> SPGKK          | -0.87 | -1.37 |
| LinJ.20.1140 | phosphatidylinositol 3-kinase, putative                       | SL <b>p</b> SGPTPNNVVSGNR                       | -0.9  | -6.45 |
| LinJ.31.1410 | hypothetical protein, unknown function                        | TEEEADAVHH <b>p</b> SAASER                      | -0.91 | -1.65 |
| LinJ.32.1290 | ADP-ribosylation factor GTPase activating protein 1, putative | VAVQAKPVGP <b>p</b> SP <b>p</b> SSPVCQGR        | -0.99 | -0.74 |

|              |                                                                        |                                                      |       |       |
|--------------|------------------------------------------------------------------------|------------------------------------------------------|-------|-------|
| LinJ.35.0390 | hypothetical protein, conserved                                        | AL <b>p</b> SEDKDGVWTPVAR                            | -1    | -0.87 |
| LinJ.17.1000 | hypothetical protein, conserved                                        | FTTTAR <b>p</b> SV <b>A</b> pTVAGEDVSTLQHR           | -1.01 | -0.8  |
| LinJ.28.2120 | hypothetical protein, conserved                                        | HRHGESAPTDPA <b>A</b> ATSAGALLR <b>p</b> TPR         | -1.04 | -6.64 |
| LinJ.29.1270 | hypothetical protein, conserved                                        | SFCSFAHADADGG <b>N</b> A <b>p</b> SEEGER             | -1.07 | -1.09 |
| LinJ.11.0140 | hypothetical protein, conserved                                        | AP <b>p</b> S <b>p</b> TPPEDCNGPCQVLVEFK             | -1.13 | -2.16 |
| LinJ.35.2530 | hypothetical protein, conserved                                        | AG <b>p</b> S <b>p</b> SIADTPARWPEDAGLSLKR           | -1.15 | -1.2  |
| LinJ.25.1100 | hypothetical protein, conserved                                        | EE <b>p</b> SEGHRRDDKVAESVATISIR                     | -1.16 | -1.32 |
| LinJ.28.2370 | glycoprotein 96-92, putative                                           | <b>p</b> SVATVEAAKK                                  | -1.24 | -2.32 |
| LinJ.27.1720 | hypothetical protein, unknown function                                 | SAP <b>S</b> pSPSNVPGR                               | -1.28 | -1.43 |
| LinJ.20.0750 | hypothetical protein, conserved                                        | GDD <b>p</b> SEDR <b>H</b> pSDVDDDGHKSGAAGTVADVAAAEK | -1.34 | -0.86 |
| LinJ.31.1400 | hypothetical protein, unknown function                                 | EAP <b>p</b> SPSVGASLVD <b>p</b> SDRTGAAR            | -1.36 | -0.84 |
| LinJ.25.1100 | hypothetical protein, conserved                                        | EE <b>p</b> SEGHRRDDKVAE <b>p</b> SVATI <b>p</b> SIR | -1.4  | -1.32 |
| LinJ.36.4790 | hypothetical protein, conserved                                        | SHHDSLMA <b>p</b> SPQATQK                            | -1.46 | -1.53 |
| LinJ.26.0790 | asparagine synthetase a, putative, aspartate--ammonia ligase, putative | APDYDDW <b>p</b> SSPVSV <b>D</b> SSK                 | -1.5  | -1.02 |
| LinJ.01.0480 | hypothetical protein, conserved                                        | AVAESAP <b>S</b> pSPTTGK                             | -1.57 | -0.87 |
| LinJ.29.1510 | RNA binding protein, putative                                          | KG <b>p</b> TASPAASVPHR                              | -1.58 | -1.47 |

|              |                                                              |                                    |       |       |
|--------------|--------------------------------------------------------------|------------------------------------|-------|-------|
| LinJ.29.1510 | RNA binding protein, putative                                | KGTApSPAASVPHR                     | -1.58 | -1.47 |
| LinJ.30.0460 | eukaryotic translation initiation factor 4e, putative        | SLQNpSPIIQPSR                      | -1.59 | -0.69 |
| LinJ.27.1720 | hypothetical protein, unknown function                       | SAPSpSPSNVPGRK                     | -1.61 | -1.35 |
| LinJ.34.1390 | hypothetical protein, conserved                              | LLGAAEAHpSPTIWR                    | -1.84 | -1.22 |
| LinJ.35.4450 | hypothetical protein, conserved                              | RPpSPKpSPK                         | -1.96 | -1.26 |
| LinJ.10.1010 | hypothetical protein, conserved                              | APpSGGLSAEGWGGR                    | -2.07 | -1.27 |
| LinJ.21.0880 | hypothetical protein, conserved                              | QPGpSPNKALAAIDPAIVSAASSQSK         | -2.11 | -1.51 |
| LinJ.29.1510 | RNA binding protein, putative                                | KDpTPLLPR                          | -2.29 | -2.21 |
| LinJ.32.1420 | RNA guanylyltransferase, putative                            | SLAGAGAVpSNDDVPLLSGFKR             | -2.57 | -2.27 |
| LinJ.03.0910 | hypothetical protein                                         | TAAMNRPYGYNVTpTEGDIDpSDLDDAAISAILK | -2.59 | -2.01 |
| LinJ.04.0520 | hypothetical protein, conserved                              | GAAVDLFAASPLASpSPTDNQQR            | -2.64 | -1.06 |
| LinJ.21.0770 | ATP-binding cassette protein subfamily E, member 1, putative | NGDDpSDNDDGSDVKAAPK                | -2.64 | -1.14 |
| LinJ.30.2890 | hypothetical protein, conserved                              | GVVSpSPTSAAPASAR                   | -3.51 | -0.39 |
| LinJ.35.5360 | polyadenylate-binding protein 1, putative                    | HSPGDVPEpTPPLPPITPQELESMSPEQR      | -6.65 | -6.66 |

Di methylation of tryptic peptides extracted from *L. donovani* promastigotes 5 min after arginine deprivation initiated. Phosphopeptide enrichment, mass spectrometry and data analysis is described in detail in Experimental Procedures
