# Supplementary material for: An Arginine Deprivation Response Pathway Is Induced in Leishmania during Macrophage Invasion
Source: PubMed Central journal article supplement (PMC4846328; doi:10.1371/journal.ppat.1005494), 2016-04-04
Supplement: ppat.1005494.s002.pdf [file ppat.1005494.s002.pdf]

**Table S2:** Phosphorylation changes following 15 minute of arginine deprivation in *L. donovani* promastigotes

| Accession number | Description                                       | Phosphorylated tryptic peptide | Repeat 1                               | Repeat 2 |
|------------------|---------------------------------------------------|--------------------------------|----------------------------------------|----------|
|                  |                                                   |                                | Log <sub>2</sub> fold from non-starved |          |
| LinJ.27.1700     | protein kinase-like protein                       | GpSPDVDDKFVDVGDATK             | 6.67                                   | 1.68     |
| LinJ.24.0160     | hypothetical protein, conserved                   | GGEEEGTNFIVDpSDDDEDEAVAAIR     | 6.6                                    | 1.9      |
| LinJ.15.0810     | protein kinase, putative                          | APPVSYNEPGHEQLDpSR             | 6.55                                   | 1.73     |
| LinJ.13.1330     | hypothetical protein, conserved                   | LSYSAATAEpSPSK                 | 5.48                                   | 1.55     |
| LinJ.35.2530     | hypothetical protein, conserved                   | AGpSpSIADTPARPWPEDAGLSLK       | 5.05                                   | 2.06     |
| LinJ.35.4450     | hypothetical protein, conserved                   | APIADpSDSpDDDEPVR              | 4.64                                   | 3.31     |
| LinJ.08.0630     | hypothetical protein, conserved                   | ASSpTEGSPVAAGTIPAVAAK          | 4.28                                   | 2.67     |
| LinJ.30.0520     | hypothetical protein, conserved                   | FApSPDKLETVTPTK                | 4.25                                   | 0.95     |
| LinJ.22.1070     | hypothetical protein, conserved                   | pSLDGAAGDAEECADAAASASTGFPR     | 3.34                                   | 1.36     |
| LinJ.09.0840     | hypothetical protein, conserved                   | pSPLATPTAVFSPNSK               | 2.76                                   | 6.74     |
| LinJ.34.3220     | DNA topoisomerase IB, large subunit               | VVpSDDDDVPLAALR                | 2.08                                   | 1.62     |
| LinJ.27.1100     | hypothetical protein, conserved                   | VpSNGQTIMQLQDELETLHR           | 2.02                                   | 1.12     |
| LinJ.31.0450     | cytoskeleton-associated protein CAP5.5, putative, | VPQPEAQpSAKVpSpSETApSVVEEQR    | 1.84                                   | 1.75     |
| LinJ.35.3150     | ATP-dependent RNA helicase, putative              | GGGpTGNEDDDYEDGGYDAYR          | 1.77                                   | 1.92     |
| LinJ.35.4450     | hypothetical protein, conserved                   | APIADpSDpSDDDEPVRKPVLAKE       | 1.66                                   | 1.29     |
| LinJ.36.5290     | hypothetical protein, conserved                   | VQVMTEDMNEDGpSNDR              | 1.63                                   | 1.48     |
| LinJ.36.2260     | DEAD box RNA helicase, putative                   | FDpYSpSDDDDSDARPAK             | 1.61                                   | 1.29     |
| LinJ.01.0790     | eukaryotic initiation factor 4a, putative         | FCETFVGGpTR                    | 1.59                                   | 1.88     |
| LinJ.36.6110     | hypothetical protein, conserved                   | KCpSAPELPPR                    | 1.57                                   | 3.48     |
| LinJ.35.0920     | hypothetical protein, conserved                   | LLNNENADDLLpSpSDDEEPK          | 1.48                                   | 1.91     |
| LinJ.25.1100     | hypothetical protein, conserved                   | FpSIEGNEPEQKPLVPTSHLR          | 1.39                                   | 2.48     |

|              |                                                              |                                                |       |       |
|--------------|--------------------------------------------------------------|------------------------------------------------|-------|-------|
| LinJ.13.0700 | hypothetical protein, conserved                              | GDNLLHSDQTPCDAAAAAGSSIVANN <b>p</b> TPR        | 1.37  | 1.23  |
| LinJ.11.1110 | 60S ribosomal protein L28, putative                          | AVAAVRPDLADV <b>p</b> SFRR                     | 1.36  | 1.19  |
| LinJ.14.1300 | hypothetical protein, conserved                              | AV <b>p</b> SVVDGPHGPHAR                       | 1.34  | 2.14  |
| LinJ.35.2240 | RNA-binding protein, putative                                | H <b>p</b> SHG <b>p</b> SNDEIQNGGDTDNFR        | 1.29  | 3.4   |
| LinJ.31.2440 | hypothetical protein, conserved                              | GNTD <b>p</b> SPDTAELAAAALQALSPQGVLHTDSR       | 1.26  | 1.73  |
| LinJ.35.2610 | hypothetical protein, conserved                              | TNTSATVT <b>p</b> SEGNSNSEK                    | 1.24  | 0.77  |
| LinJ.08.1040 | Phosphoribosylpyrophosphate synthetase                       | MTEVHAMSGTV <b>p</b> SPHTEK                    | 1.22  | 0.99  |
| LinJ.35.4450 | hypothetical protein, conserved                              | APIAD <b>p</b> SD <b>p</b> SDDDEPVRKPVAK       | 1.22  | 1.1   |
| LinJ.35.4060 | protein kinase A catalytic subunit isoform 1                 | SPGDTSNFEKYPD <b>p</b> SPVDR                   | 1.19  | 1.13  |
| LinJ.31.2700 | serine/threonine protein phosphatase pp1(5.9), putative      | DAN <b>p</b> SPLSSFAR                          | 1.16  | 1.68  |
| LinJ.27.1630 | hypothetical protein, conserved                              | NLP <b>p</b> SVDDGLYQK                         | 1.14  | 1.46  |
| LinJ.04.0060 | hypothetical protein, conserved                              | GNEEEERNE <b>p</b> TPRDCK                      | 1.01  | 1.18  |
| LinJ.01.0480 | hypothetical protein, conserved                              | AVAESAP <b>p</b> SPTTGK                        | 0.98  | 0.9   |
| LinJ.33.2570 | hypothetical protein, conserved                              | Q <b>p</b> SATATTAAPGEDVDPMEAK                 | 0.97  | 0.95  |
| LinJ.33.2570 | hypothetical protein, conserved                              | Q <b>p</b> SATATTAAPGEDVDPMEAK                 | 0.97  | 0.89  |
| LinJ.36.2490 | tyrosine aminotransferase                                    | AGNSTG <b>p</b> SLTEER                         | 0.94  | 1.25  |
| LinJ.36.2490 | tyrosine aminotransferase                                    | AGN <b>p</b> STGSLTEER                         | 0.94  | 1.1   |
| LinJ.31.0090 | hypothetical protein, conserved                              | <b>p</b> SAEKAPEKPVADKEAEDA EK                 | 0.68  | 0.78  |
| LinJ.11.0150 | hypothetical protein, conserved                              | IQDVNEDSGLPFDVE <b>p</b> SAHREGD <b>p</b> SPAR | 0.55  | 1.3   |
| LinJ.34.0500 | calcium channel protein, putative, ion transporter, putative | LYRQP <b>p</b> SLPATEMGF <b>p</b> SVVGTPQQR    | -0.81 | -1.94 |
| LinJ.13.1350 | MCAK-like kinesin, putative                                  | ERVAEQPRPM <b>p</b> SAQR                       | -0.85 | -3.31 |
| LinJ.20.1130 | hypothetical protein, conserved                              | GYEG <b>p</b> TD <b>p</b> SEDGENHHHSAAGAGKK    | -0.85 | -0.63 |
| LinJ.35.4450 | hypothetical protein, conserved                              | RP <b>p</b> SPK <b>p</b> SPK                   | -0.9  | -3.01 |
| LinJ.32.0370 | hypothetical protein, conserved                              | SAAAGAG <b>p</b> SAKRPA GLSPGAAAALAADEK        | -0.92 | -0.93 |
| LinJ.36.1560 | hypothetical protein, conserved                              | AGKQH <b>p</b> SDEEVELSVK                      | -0.94 | -1.71 |

|              |                                                |                                                                 |       |       |
|--------------|------------------------------------------------|-----------------------------------------------------------------|-------|-------|
| LinJ.19.1140 | hypothetical protein, conserved                | GDD <b>p</b> SEDREH <b>p</b> SDVDDDDGHKSGAAGTVADVAAA <b>AEK</b> | -1.03 | -1.78 |
| LinJ.19.1140 | hypothetical protein, conserved                | GDDSEDREH <b>p</b> SDVDDDDGHKSGAAGTVADVAAA <b>AEK</b>           | -1.03 | -2.24 |
| LinJ.13.0290 | flagellar radial spoke protein, putative       | ITSSTTIAPQGALEEPEPE <b>QEp</b> TEEDEDEDAEDGAQRK <b>PK</b>       | -1.05 | -6.65 |
| LinJ.19.1140 | hypothetical protein, conserved                | QRHT <b>p</b> SPSPYEQV <b>PK</b>                                | -1.2  | -1.94 |
| LinJ.29.1510 | RNA binding protein, putative                  | D <b>p</b> TPLLL <b>PR</b>                                      | -1.29 | -1.22 |
| LinJ.29.2540 | hypothetical protein, unknown function         | RYVPPSEEQDAEAAG <b>Qp</b> SAS <b>R</b>                          | -1.5  | -4.52 |
| LinJ.21.0920 | hypothetical protein, conserved                | AR <b>p</b> SQLAAVRDDLA <b>QR</b>                               | -1.52 | -2.51 |
| LinJ.32.2950 | RNA-binding protein, putative                  | AR <b>p</b> SGEDDCDDEENTFN <b>FKR</b>                           | -1.59 | -6.7  |
| LinJ.30.0580 | hypothetical protein, conserved                | TTGRDPNED <b>p</b> SG <b>p</b> SDAEEVTEEELAA <b>RK</b>          | -1.61 | -4.87 |
| LinJ.25.1920 | hypothetical protein, conserved                | AKPVVPFDVSDYEDKKV <b>Qp</b> SP <b>K</b>                         | -1.65 | -2.61 |
| LinJ.33.3230 | hypothetical protein, conserved                | VG <b>p</b> TPVEPHRGALEG <b>p</b> SPVD <b>AR</b>                | -1.72 | -3.42 |
| LinJ.33.3230 | hypothetical protein, conserved                | VG <b>p</b> TPVEPHRGALEGAS <b>PVDAR</b>                         | -1.72 | -6.33 |
| LinJ.12.0720 | hypothetical protein, conserved                | DLLAR <b>p</b> TPDVGDDDD <b>EDLRR</b>                           | -1.77 | -1.63 |
| LinJ.22.0060 | hypothetical protein, conserved                | ASVENARH <b>p</b> SAQNAVD <b>NAK</b>                            | -1.78 | -1.29 |
| LinJ.16.1550 | kinesin, putative                              | SV <b>p</b> SGTG <b>p</b> SKGT <b>FKR</b>                       | -1.8  | -1.37 |
| LinJ.18.1510 | P-type H <sup>+</sup> -ATPase, putative        | KYELDAAAFEDKPE <b>p</b> SH <b>p</b> SDAEMTPQKP <b>QRR</b>       | -1.8  | -2.79 |
| LinJ.05.0140 | nucleolar RNA helicase II, putative            | ISAKA <b>p</b> SDHGNGVAVE <b>K</b>                              | -1.81 | -2.03 |
| LinJ.20.1670 | hypothetical protein, conserved                | EQR <b>p</b> SPATVVAPED <b>KK</b>                               | -1.86 | -5.88 |
| LinJ.34.0700 | hypothetical protein, conserved                | AAPELADADGVEPSSGPTSS <b>Rp</b> SPT <b>GR</b>                    | -1.88 | -1.23 |
| LinJ.36.6780 | ubiquitin fusion degradation protein, putative | VAAG <b>p</b> TPPLKHLPGSSSPSS <b>GPK</b>                        | -1.95 | -6.75 |
| LinJ.15.0300 | hypothetical protein, conserved                | AALPEALAVHAHDWD <b>p</b> SSSSGR <b>R</b>                        | -1.97 | -1.95 |
| LinJ.11.0520 | nucleobase transporter                         | YLADSG <b>p</b> SEKKAELLETEHGDV <b>TAR</b>                      | -1.99 | -1.34 |
| LinJ.29.0280 | hypothetical protein, conserved                | LAAR <b>p</b> SPAK <b>p</b> SP <b>AR</b>                        | -2    | -1.44 |
| LinJ.17.1310 | hypothetical protein, unknown function         | VFNRDG <b>p</b> SAVA <b>QR</b>                                  | -2.07 | -2.77 |
| LinJ.21.1850 | hypothetical protein, conserved                | MRVEQVLAHQ <b>Mp</b> SPSAS <b>GR</b>                            | -2.09 | -1.63 |

|              |                                                    |                                                 |       |       |
|--------------|----------------------------------------------------|-------------------------------------------------|-------|-------|
| LinJ.36.6110 | hypothetical protein, conserved                    | KRGG <b>p</b> SINGATALLR                        | -2.17 | -6.7  |
| LinJ.27.1220 | hypothetical protein, conserved                    | HVF <b>p</b> TPEGCKYGDK                         | -2.27 | -6.75 |
| LinJ.29.0120 | proteasome regulatory non-ATPase subunit, putative | EGNA <b>p</b> SEEEAAKPEEEKTAPLNHK               | -2.36 | -1.57 |
| LinJ.34.3220 | DNA topoisomerase IB, large subunit                | ANKVV <b>p</b> SDDDDVPLAALRV                    | -2.39 | -2.74 |
| LinJ.04.0060 | hypothetical protein, conserved                    | NE <b>p</b> TPRDPCKL <b>p</b> TDVSTDHYAK        | -2.4  | -6.67 |
| LinJ.21.0920 | hypothetical protein, conserved                    | AL <b>p</b> SAV <b>p</b> SEKNADFNDLRR           | -2.65 | -1.21 |
| LinJ.05.0100 | phosphoprotein phosphatase, putative               | ETKGPV <b>p</b> SPR                             | -2.7  | -2.6  |
| LinJ.04.0060 | hypothetical protein, conserved                    | VNIDNVERHPPVPEGVN <b>p</b> TPR                  | -2.87 | -6.67 |
| LinJ.34.1610 | hypothetical protein, conserved                    | DVGDHREApSVL <b>p</b> TAAGR                     | -2.93 | -2.37 |
| LinJ.14.0860 | hypothetical protein, conserved                    | KASAGGDDDEA <b>Qp</b> SPESPKETK                 | -3.05 | -6.73 |
| LinJ.36.6290 | hypothetical protein, conserved                    | EAVEHA <b>p</b> SVQDTAAKEVEATK                  | -3.13 | -3.63 |
| LinJ.24.2180 | hypothetical protein, conserved                    | AHKDYVVPELPEEPMWPLIGH <b>p</b> TP               | -3.17 | -1.52 |
| LinJ.18.1510 | P-type H -ATPase, putative                         | ALEGLREDTHVLNEST <b>p</b> SPVNAFSPK             | -3.28 | -1.74 |
| LinJ.31.1230 | hypothetical protein, conserved                    | AER <b>p</b> SPFGGFECPEGYWVCSVEHGGCSK           | -4.6  | -4.91 |
| LinJ.29.0280 | hypothetical protein, conserved                    | SPAK <b>p</b> SPARAN <b>p</b> SPEPQMSTSASSTPR   | -4.72 | -6.38 |
| LinJ.13.1350 | MCAK-like kinesin, putative                        | VQAAIQAPALPARIP <b>p</b> TPLRR                  | -4.76 | -4.32 |
| LinJ.07.0620 | hypothetical protein, conserved                    | KAAAAQRGDD <b>p</b> T <b>p</b> SDNEAVNAQAR      | -5.09 | -3.61 |
| LinJ.25.1120 | hypothetical protein, conserved                    | <b>p</b> SNFG <b>p</b> SRVDLHNLGDLR             | -5.67 | -2.07 |
| LinJ.25.1120 | hypothetical protein, conserved                    | SNFG <b>p</b> SRVDLHNLGDLR                      | -5.67 | -4.08 |
| LinJ.32.0370 | hypothetical protein, conserved                    | RPAGLSPGAAAALAADEK <b>QAp</b> SCAACH            | -5.76 | -6.45 |
| LinJ.15.0060 | hypothetical protein, conserved                    | KPL <b>p</b> TPPRLILAPPTALG <b>Qp</b> SPDVKPK   | -5.95 | -6.25 |
| LinJ.13.0700 | hypothetical protein, conserved                    | R <b>p</b> SRSPVAWTASIGGAAK                     | -6.51 | -3.13 |
| LinJ.13.0620 | ubiquitin-like protein                             | RSDDSLQFEQDASQQPT <b>p</b> SPLLPPQAPVKAPAASAFDR | -6.7  | -2.37 |
| LinJ.35.0300 | hypothetical protein, conserved                    | AP <b>p</b> SPDFLGSQLLAEYRGEAASLQLAK            | -6.86 | -5.37 |
| LinJ.18.0590 | RNA binding protein, putative                      | A <b>p</b> SPQQAAVQSAPGKIEYLR                   | -6.94 | -4.48 |

|              |                                        |                 |       |      |
|--------------|----------------------------------------|-----------------|-------|------|
| LinJ.23.1190 | hypothetical protein, unknown function | NEpSDDMERQADEKR | -7.31 | -7.1 |
|--------------|----------------------------------------|-----------------|-------|------|

Di methylation of tryptic peptides extracted from *L. donovani* promastigotes 15 min after arginine deprivation initiated. Phosphopeptide enrichment, mass spectrometry and data analysis is described in detail in Experimental Procedures
